# Supplementary material for: The short- and long-term temporal relation between falls and concern about falling in older adults without a recent history of falling
Source: PubMed Central journal article supplement (PMC8270453; doi:10.1371/journal.pone.0253374), 2021-07-09
Supplement: pone.0253374.s002.pdf [file pone.0253374.s002.pdf]

Supplementary material - Temporal relation between falls and concern about falling in older adults without history of falling

**S2 Table. Participant characteristics of both participants with and without a recent history of falling.** All values are means (standard deviation) assessed at baseline unless otherwise noted. IQR = Inter quartile range. Changes in walking duration and FES-I scores from baseline assessment to one-year later are presented, positive values represent increases, negative values represent decreases. <sup>1</sup> information on six participants was missing. <sup>2</sup> information on two participants was missing. <sup>3</sup> information on one participant was missing.

|                                                                                 | Without a recent history of falling (N=118) |                 | With a recent history of falling (N=114) |                 |
|---------------------------------------------------------------------------------|---------------------------------------------|-----------------|------------------------------------------|-----------------|
| Age, years                                                                      | 71.4 (5.3)                                  |                 | 71.7 (5.8)                               |                 |
| Female, n (%)                                                                   | 82 (69.5)                                   |                 | 79 (69.3)                                |                 |
| Body height, cm                                                                 | 169.0 (8.3)                                 |                 | 169 (7.9)                                |                 |
| Body weight, kg                                                                 | 73.8 (12.6)                                 |                 | 73.1 (13.8)                              |                 |
| Baseline Quickscreen, n (%)                                                     | <sup>1</sup>                                |                 | <sup>2</sup>                             |                 |
| 7% fall risk                                                                    | 45 (38.1)                                   |                 | 4 (3.5)                                  |                 |
| 13% fall risk                                                                   | 60 (50.8)                                   |                 | 75 (65.8)                                |                 |
| 27% fall risk                                                                   | 4 (3.4)                                     |                 | 21 (18.4)                                |                 |
| 49% fall risk                                                                   | 3 (2.5)                                     |                 | 12 (10.5)                                |                 |
| Combined hand grip force, kg                                                    | 60.4 (16.7)                                 |                 | 57.1 (15.0)                              |                 |
| Baseline walking duration, min/day                                              | 84.6 (31.4)                                 |                 | 82.0 (30.3)                              |                 |
| One-year change in walking duration, min/day                                    | -0.2 (19.9)                                 |                 | 1.86 (21.5)                              |                 |
| Uses walking aid, n (%)                                                         | 3 (2.5) <sup>3</sup>                        |                 | 8 (7.0)                                  |                 |
| Highest achieved education, n (%)                                               |                                             |                 |                                          |                 |
| Higher education                                                                | 96 (81.4)                                   |                 | 94 (82.5)                                |                 |
| Lower secondary education                                                       | 19 (16.1)                                   |                 | 16 (14.0)                                |                 |
| Primary education                                                               | 3 (2.5)                                     |                 | 4 (3.5)                                  |                 |
| MMSE score, median [IQR]                                                        | 28 [28, 29]                                 |                 | 29 [28, 30]                              |                 |
| Self-reported comorbidities, n (%)                                              |                                             |                 |                                          |                 |
| Diabetes                                                                        | 5 (4.2)                                     |                 | 10 (8.8)                                 |                 |
| High blood pressure                                                             | 35 (29.7)                                   |                 | 28 (24.6) <sup>3</sup>                   |                 |
| Low blood pressure                                                              | 6 (5.1)                                     |                 | 6 (5.3)                                  |                 |
| Cerebral infarction                                                             | 5 (4.2)                                     |                 | 3 (2.6)                                  |                 |
| Myocardial infarction                                                           | 9 (7.6)                                     |                 | 1 (0.9)                                  |                 |
| Thyroid condition                                                               | 6 (5.1)                                     |                 | 7 (6.1)                                  |                 |
| Asthma or Chronic Obstructive Pulmonary Disease                                 | 9 (7.6)                                     |                 | 7 (6.1)                                  |                 |
| Pain in joints                                                                  | 50 (42.4)                                   |                 | 57 (50)                                  |                 |
| Osteoporosis                                                                    | 15 (12.7) <sup>3</sup>                      |                 | 18 (15.8) <sup>3</sup>                   |                 |
| Time between completion of monthly follow-up questionnaires, median [IQR], days | 30 [28, 35]                                 |                 | 30 [28, 35]                              |                 |
| Baseline FES-I score, median [IQR]                                              | 18 [17, 21]                                 |                 | 20 [18, 23]                              |                 |
| One-year change in FES-I score, median [IQR]                                    | 0 [-1, 1]                                   |                 | 0 [-2, 1]                                |                 |
| Number of falls experienced during one-year follow-up, n (%)                    | All falls                                   | Injurious falls | All falls                                | Injurious falls |
| None                                                                            | 58 (49.2)                                   | 78 (66.1)       | 47 (41.2)                                | 73 (64.0)       |
| One                                                                             | 30 (25.4)                                   | 31 (26.3)       | 34 (29.8)                                | 21 (18.4)       |
| Two or more                                                                     | 30 (25.4)                                   | 9 (7.6)         | 33 (28.9)                                | 20 (17.5)       |
